# Supplementary material
Source: PubMed Central journal article supplement (PMC9252324)
Supplement: NIHMS1820061-supplement-1.pdf [file NIHMS1820061-supplement-1.pdf]

**Cell Chemical Biology, Volume 27**

**Supplemental Information**

**Site-Specific Incorporation of Genetically  
Encoded Photo-Crosslinkers Locates the Heteromeric  
Interface of a GPCR Complex in Living Cells**

**Urjita H. Shah, Rudy Toneatti, Supriya A. Gaitonde, Jong M. Shin, and Javier González-  
Maeso**

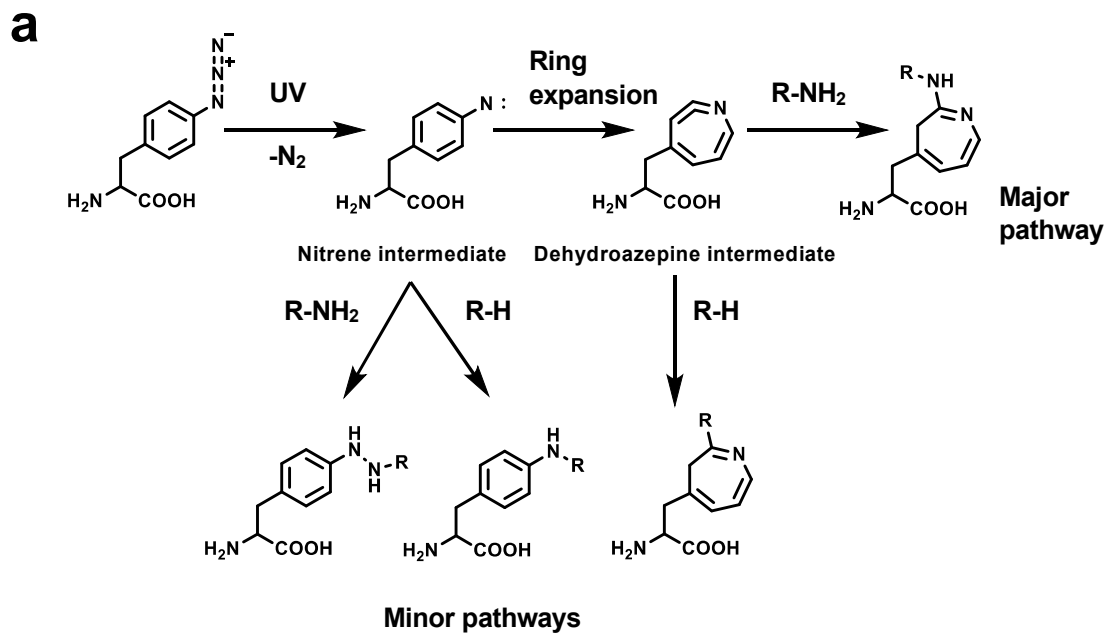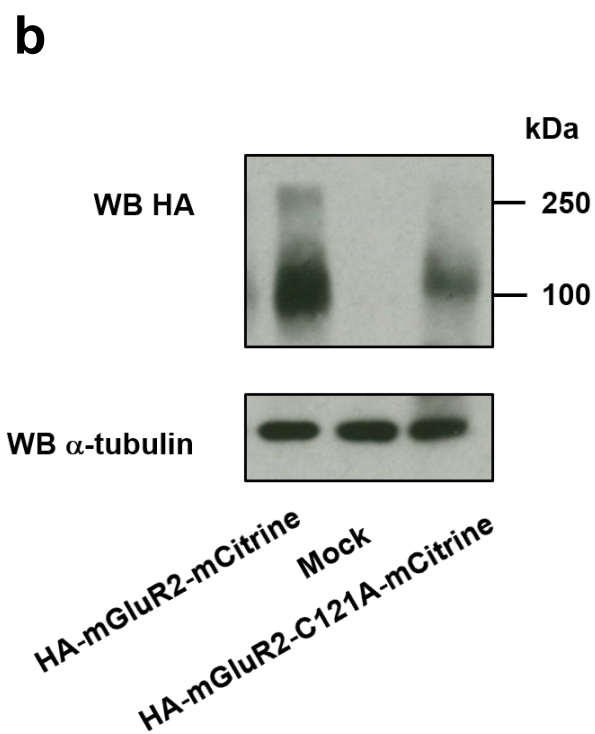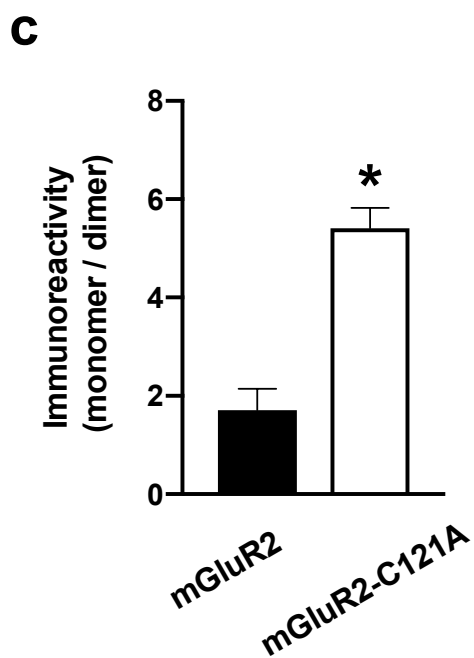

**a**

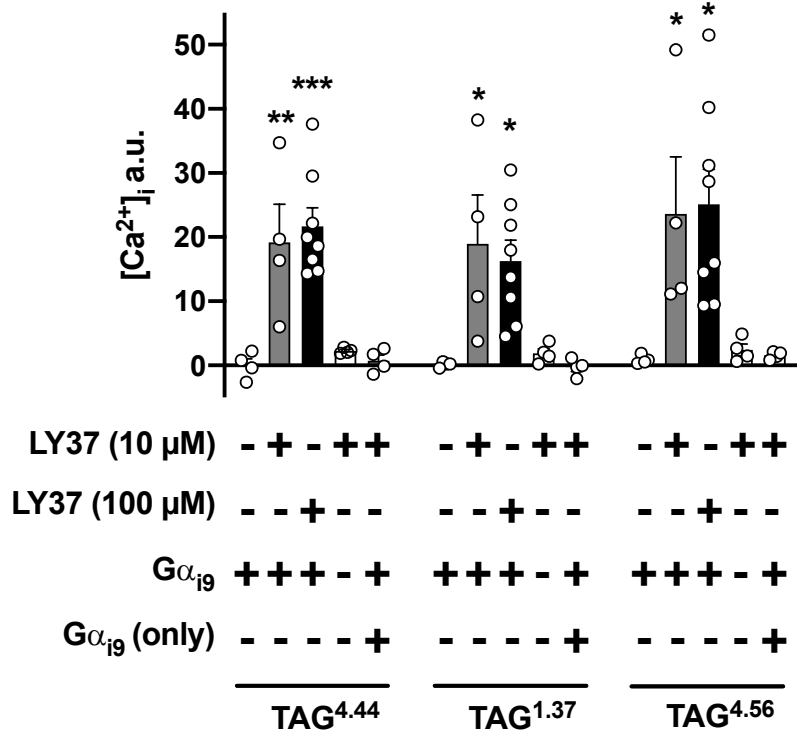

**b**

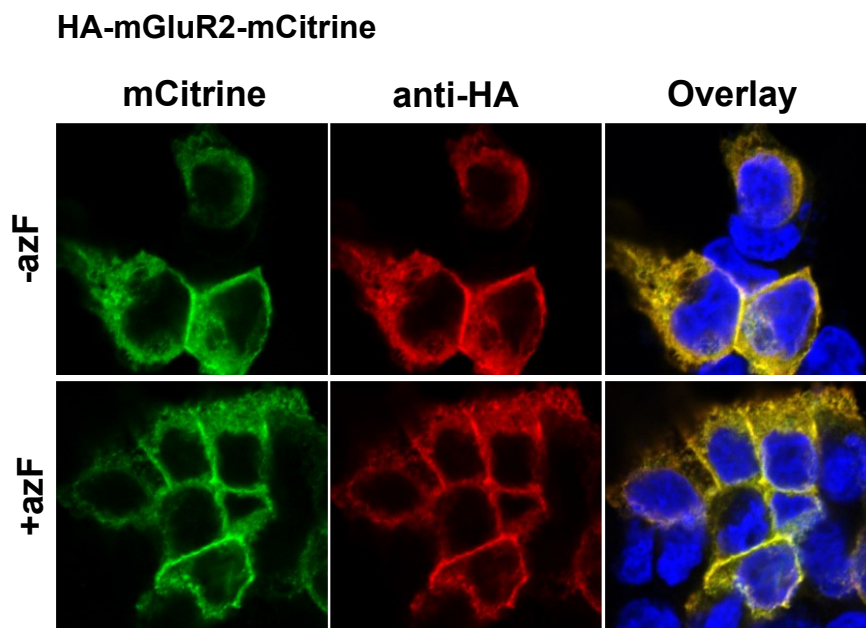

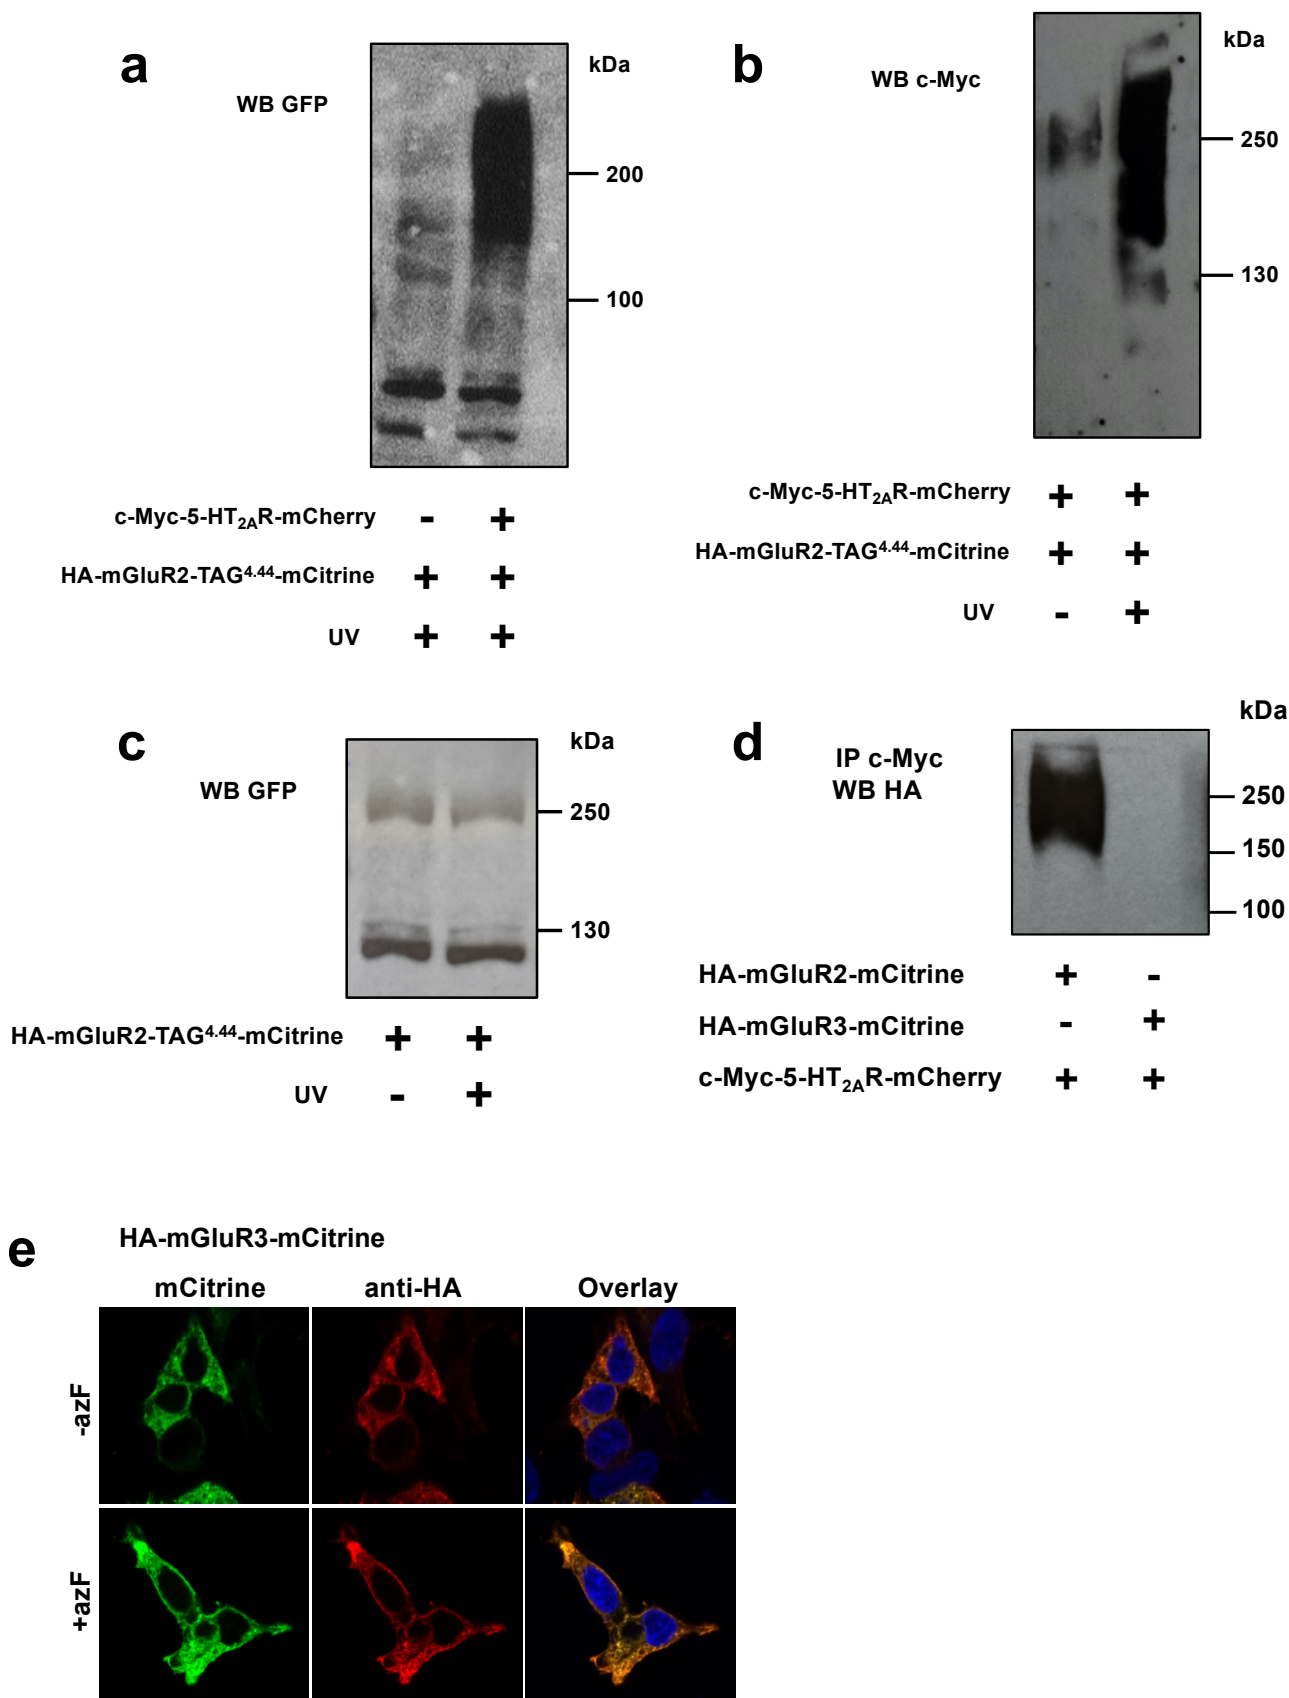

## Supplementary Figure legends

**Figure S1. (A)** The photoactivatable unnatural amino acid azF upon exposure to UV-A light forms an unstable nitrene intermediate that can either undergo addition reactions with double bonds, insertion into C–H and N–H sites (minor pathways), or ring expansion into a dehydroazepine intermediate that can react with a nucleophile such as a primary amine (major pathway) (Preston and Wilson, 2013). **(B,C)** Immunoblot analysis in membrane preparation of cells stably expressing HA-GluR2-mCitrine, HA-mGluR2-C121A-mCitrine, or mock (n = 2). Representative immunoblots **(B)** and quantification of immunoreactivity **(C)**. Mean  $\pm$  s.e.m. \* $p < 0.05$  by Student's *t* test. Related to Figures 1 and 3.

**Figure S2. (A)** Cells co-transfected with constructs encoding suppressor tRNA and azF aaRS, along with HA-mGluR2-TAG<sup>1.37</sup>-mCitrine, HA-mGluR2-TAG<sup>4.44</sup>-mCitrine or HA-mGluR2-TAG<sup>4.56</sup>-mCitrine, were loaded with Fura-2 and monitored for intracellular calcium release after administration of LY379268 (LY37; 10  $\mu$ M or 100  $\mu$ M), or vehicle. Experiments were carried out in cells exposed to azF. Controls included cells untransfected with G $\alpha_{i9}$ , and cells transfected with G $\alpha_{i9}$  only (n = 4 – 8 independent experiments per experimental condition). Mean  $\pm$  s.e.m. \* $p < 0.05$ , \*\* $p < 0.01$  and \*\*\* $p < 0.001$  by Dunnett's *post hoc* test of one-way ANOVA. **(B)** Cells exposed to azF (+azF) or mock (-azF) and transfected with the constructs encoding "wild-type" HA-mGluR2-mCitrine were permeabilized to detect the HA epitope and imaged to detect mCitrine fluorescence. Nuclei were stained in blue with Hoechst. Related to Figure 2.

**Figure S3. (A)** Cells exposed to azF were co-transfected with constructs encoding suppressor tRNA and azF aaRS, along with HA-mGluR2-TAG<sup>4.44</sup>-mCitrine and/or c-Myc-5-HT<sub>2A</sub>R-mCherry. Cells were then exposed to UV, processed for membrane preparation, and analyzed by Western blotting (WB) with antibody against GFP (which also recognizes mCitrine). **(B)**. Cells exposed to azF were co-transfected with constructs encoding suppressor tRNA and azF aaRS, along with HA-mGluR2-TAG<sup>4.44</sup>-mCitrine and c-Myc-5-HT<sub>2A</sub>R-mCherry. After this, the same group of cells was separated into two groups that

were either exposed to UV or mock. Cells (UV[+] and UV[-]) were afterwards processed for membrane preparation and analyzed by Western blotting (WB) with antibody against c-Myc. **(C)** Cells exposed to azF were co-transfected with constructs encoding suppressor tRNA and azF aaRS, along with HA-mGluR2-TAG<sup>4.44</sup>-mCitrine. After this, the same group of cells was separated into two groups that were either exposed to UV or mock. Cells (UV[+] and UV[-]) were afterwards processed for membrane preparation and analyzed by Western blotting (WB) with antibody against GFP. **(D)** Cells co-transfected with c-Myc-5-HT<sub>2A</sub>R-mCherry and either HA-mGluR2-mCitrine or HA-mGluR3-mCitrine were subjected to co-immunoprecipitation (IP) with antibody against the c-Myc tag, and then analyzed by Western blotting with antibody against the HA tag. **(E)** Cells exposed to azF (+azF) or mock (-azF) and transfected with the constructs encoding “wild-type” HA-mGluR3-mCitrine were permeabilized to detect the HA epitope and imaged to detect mCitrine fluorescence. Nuclei were stained in blue with Hoechst. Related to Figures 3 and 4.

**Table S1.** Binding saturation curves with [<sup>3</sup>H]LY341495. Related to Figure 2

|                        | mGluR2       | mGluR2-TAG <sup>4.44</sup> |               | mGluR2-TAG <sup>4.56</sup> |              | mGluR2-TAG <sup>1.37</sup> |              |
|------------------------|--------------|----------------------------|---------------|----------------------------|--------------|----------------------------|--------------|
|                        |              | +azF                       | -azF          | +azF                       | -azF         | +azF                       | -azF         |
| <b>B<sub>max</sub></b> | 2030 ± 129.9 | 332.4 ± 115.5              | 123.0 ± 70.77 | 335.1 ± 63.1               | 167.0 ± 9.46 | 246.8 ± 35.9               | 33.52 ± 7.61 |
| <b>K<sub>D</sub></b>   | 2.64 ± 0.31  | 4.58 ± 2.13                | 3.84 ± 5.09   | 1.95 ± 0.34                | 2.57 ± 0.38  | 1.98 ± 0.85                | 0.22 ± 0.23  |

B<sub>max</sub> (fmol/mg prot); K<sub>D</sub> (nM)

Radioligand binding saturation curves with [<sup>3</sup>H]LY341495 in membrane preparations of cells transfected with HA-mGluR2-mCitrine, or previously exposed to azF or vehicle and co-transfected with constructs encoding suppressor tRNA and azF aaRS, along with HA-mGluR2-TAG<sup>4.44</sup>-mCitrine, HA-mGluR2-TAG<sup>4.56</sup>-mCitrine, or HA-mGluR2-TAG<sup>1.37</sup>-mCitrine (n = 4 independent binding assays per experimental condition). Density (B<sub>max</sub>) was higher with HA-mGluR2-mCitrine, as compared to HA-mGluR2-TAG<sup>4.44</sup>-mCitrine (+azF), HA-mGluR2-TAG<sup>4.56</sup>-mCitrine (+azF), or HA-mGluR2-TAG<sup>1.37</sup>-mCitrine (+azF), (*p* < 0.001 by Dunnett's *post hoc* test of one-way ANOVA). No statistically significant difference between densities of HA-mGluR2-TAG<sup>4.44</sup>-mCitrine (+azF), HA-mGluR2-TAG<sup>4.56</sup>-mCitrine (+azF), or HA-mGluR2-TAG<sup>1.37</sup>-mCitrine (+azF) (*p* > 0.05 by Dunnett's *post hoc* test of one-way ANOVA). Density was higher with HA-mGluR2-TAG<sup>4.44</sup>-mCitrine (+azF), HA-mGluR2-TAG<sup>4.56</sup>-mCitrine (+azF) and HA-mGluR2-TAG<sup>1.37</sup>-mCitrine (+azF), as compared to HA-mGluR2-TAG<sup>4.44</sup>-mCitrine (-azF), HA-mGluR2-TAG<sup>4.56</sup>-mCitrine (-azF), or HA-mGluR2-TAG<sup>1.37</sup>-mCitrine (-azF), respectively (*p* < 0.001 by Student's *t*-test). No statistically significant difference between affinities (K<sub>D</sub>) of [<sup>3</sup>H]LY341495 against HA-mGluR2-mCitrine, HA-mGluR2-TAG<sup>4.44</sup>-mCitrine (+azF), HA-mGluR2-TAG<sup>4.56</sup>-mCitrine (+azF), and HA-mGluR2-TAG<sup>1.37</sup>-mCitrine (+azF) (*p* > 0.05 by Dunnett's *post hoc* test of one-way ANOVA). Data are mean ± s.e.m.

**Table S2.** Binding saturation curves with [<sup>3</sup>H]LY341495. Related to Figure 4.

|                        | mGluR3       | mGluR3-TAG <sup>4.44</sup> |      |
|------------------------|--------------|----------------------------|------|
|                        |              | +azF                       | -azF |
| <b>B<sub>max</sub></b> | 3255 ± 439.5 | 263.0 ± 47.92              | n.a. |
| <b>K<sub>D</sub></b>   | 5.50 ± 0.89  | 3.09 ± 0.85                | n.a. |

B<sub>max</sub> (fmol/mg prot); K<sub>D</sub> (nM)

Radioligand binding saturation curves with [<sup>3</sup>H]LY341495 in membrane preparations of cells transfected with HA-mGluR3-mCitrine, or previously exposed to azF or vehicle and co-transfected with constructs encoding suppressor tRNA and azF aaRS, along with HA-mGluR3-TAG<sup>4.44</sup>-mCitrine (n = 4 independent binding assays per experimental condition). Density (B<sub>max</sub>) was higher with HA-mGluR3-mCitrine, as compared to HA-mGluR3-TAG<sup>4.44</sup>-mCitrine (+azF), (*p* < 0.001 by Student's *t*-test). Non-linear regression analysis (binding saturation curve) was not applicable (n.a.) in HA-mGluR3-TAG<sup>4.44</sup>-mCitrine (-azF) cells. No statistically significant difference between affinities (K<sub>D</sub>) of [<sup>3</sup>H]LY341495 against HA-mGluR3-mCitrine and HA-mGluR3-TAG<sup>4.44</sup>-mCitrine (+azF), (*p* > 0.05 by Student's *t*-test). Data are mean ± s.e.m.



**Table S3:** Primer Sequences. Related to STAR Methods.

| Mutant                                        | Oligonucleotide Sequence                                                                                                              |
|-----------------------------------------------|---------------------------------------------------------------------------------------------------------------------------------------|
| HA-mGluR2-Cys121Ala-mCitrine                  | Forward:<br>5'- GGCTCACGCCACATCGCGCCCGACGGCTCTTAT-3'<br>Reverse:<br>5'- ATAAGAGCCGTCTGGGCGCGATGTGGCGTGAGCC-3'                         |
| HA-mGluR2-Ala <sup>4.44</sup> TAG-mCitrine    | Forward:<br>5'-<br>GATAAGTGCCAGGCAGATCTACACCTGTGAGGCAGGACT-<br>3'<br>Reverse:<br>5'-AGTCCTGCCTCACAGGTGTAGATCTGC CTG GCA CTT<br>ATC-3' |
| HA-mGluR2-Val569 <sup>1.37</sup> TAG-mCitrine | Forward:<br>5'-GGTGACAGGTCCCTAAGCCCAGGCATCGC-3'<br>Reverse:<br>5'-GCGATGCCTGGGCTTAGGGACCTGTCACC-3'                                    |
| HA-mGluR2-Ile693 <sup>4.56</sup> TAG-mCitrine | Forward:<br>5'-CGGGCCAGCTGCTCTAGGTGGTCGCCTGGCT-3'<br>Reverse:<br>5'-AGCCAGGCGACCACCTAGAGCAGCTGGCCCG-3'                                |
| HA-mGluR3-Phe690 <sup>4.44</sup> TAG-mCitrine | Forward:<br>5'-CCCCAGTTCTCAGGTTTAGATCTGCCTGGGTCTG-3'<br>Reverse:<br>5'-CAGACCCAGGCAGATCTAACCTGAGAACTGGGG-3'                           |
